# Supplementary material for: RETRACTED: Neuroprotective Effects of Dried Tubers of Aconitum napellus
Source: MDPI journal article supplement (doi:10.3390/plants9030356), 2020-03-11
Supplement: s1 [file s1]

## Quantitative estimation:

**Figure S1 Calibration curve of standard aconitine:** In the present study the HPLC method was done as per Dubey et al., 2012. Further the quantitative estimation of aconitine was done in goat milk treated chloroform extract of *Aconitum napellus* using aconitine as standard. Calibration curve of mean area against concentration of varying concentrations of standard aconitine was plotted figure as per calculations stated in table.

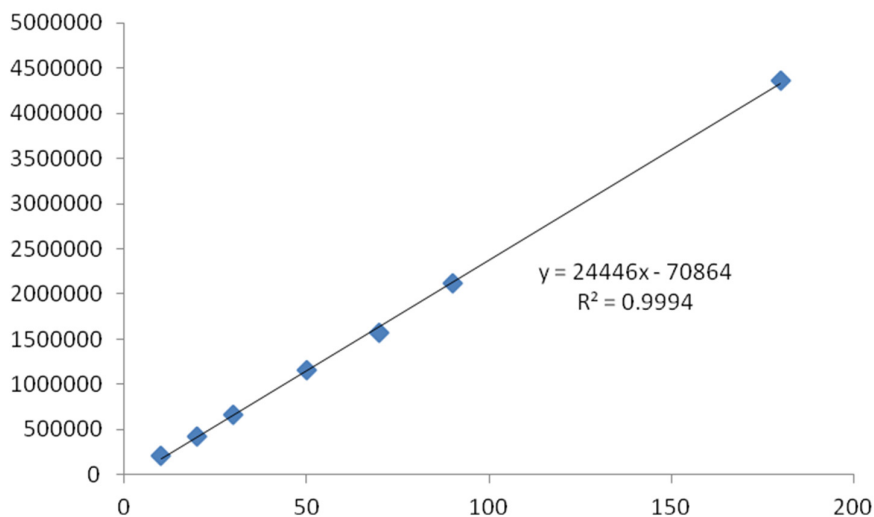

**Figure S1.** Calibration curve of mean area against concentration of standard aconitine.

**Table S1:** Peak area and percentages of different components with specific retention time (Rt) in HPLC chromatograms of standard aconitine and Goat milk treated chloroform extract of *Aconitum napellus*.

| HPLC Chromatograms                                                        | Different Components with Specific Rt | Peak Area | Area % | Height | Height% |
|---------------------------------------------------------------------------|---------------------------------------|-----------|--------|--------|---------|
| 1. Aconitine<br>(Active constituent of <i>Aconitum napellus</i> )         | 11.767                                | 660437    | 100    | 31064  | 100     |
| 2. Goat milk treated<br>chloroform extract of<br><i>Aconitum napellus</i> | 3.550                                 | 78164     | 1.044  | 6736   | 2.303   |
|                                                                           | 5.067                                 | 5002968   | 66.813 | 193248 | 66.080  |
|                                                                           | 9.350                                 | 141319    | 1.887  | 8261   | 2.825   |
|                                                                           | 10.050                                | 1321701   | 17.651 | 49229  | 16.833  |
|                                                                           | 11.750                                | 679647    | 9.076  | 29442  | 10.067  |
|                                                                           | 27.725                                | 264212    | 3.528  | 5531   | 1.891   |
